# Supplementary material for: Blending networks networks in translation
Source: Royal Society of Chemistry journal article supplement (doi:10.1039/d2nr04532j), 2005-01-01
Supplement: d2nr04532j1.pdf [file d2nr04532j1.pdf]

## Frictionless nanohighways on crystalline surfaces

Emanuele Panizon<sup>1,5,†</sup>, Andrea Silva<sup>2,3,†</sup>, Xin Cao<sup>1</sup>, Jin Wang<sup>3</sup>, Clemens Bechinger<sup>1</sup>, Andrea Vanossi<sup>2,3</sup>, Erio Tosatti<sup>3,5,2</sup>, and Nicola Manini<sup>4\*</sup>

<sup>1</sup>*Fachbereich Physik, University Konstanz, 78464 Konstanz, Germany*

<sup>2</sup>*CNR-IOM, Consiglio Nazionale delle Ricerche - Istituto  
Officina dei Materiali, c/o SISSA, 34136 Trieste, Italy*

<sup>3</sup>*International School for Advanced Studies (SISSA),  
Via Bonomea 265, 34136 Trieste, Italy*

<sup>4</sup>*Dipartimento di Fisica, Università degli Studi di Milano,  
Via Celoria 16, 20133 Milano, Italy and*

<sup>5</sup>*International Centre for Theoretical Physics (ICTP),  
Strada Costiera 11, 34151 Trieste, Italy<sup>†</sup>*

(Dated: November 11, 2022)

---

\* [nicola.manini@unimi.it](mailto:nicola.manini@unimi.it)

† Emanuele Panizon and Andrea Silva contributed equally

## I. DIRECTIONAL STRUCTURAL LUBRICITY IN WSe<sub>2</sub> ON CuF(001)

An example of B-like realistic interface based on the materials reported in Ref. [1]. The adsorbate is a flake of WSe<sub>2</sub> (lattice spacing  $a = 0.3316$  nm) and the substrate is a CuF(001) (lattice spacing  $b = 0.3747$  nm). The adsorbate and substrate are mutually rotated by  $\theta_0 = 3.317^\circ$ . The frictional behaviour is summarized in Fig. 1, which presents a similar investigation of the frictional regime as a function of size as that in the main text (Figures 5 and 6) for different systems.

- 
- [1] N. Mounet, M. Gibertini, P. Schwaller, D. Campi, A. Merkys, A. Marrazzo, T. Sohier, I. E. Castelli, A. Cepellotti, G. Pizzi, and N. Marzari, [Nature Nanotechnology](#) **13**, 246 (2018).

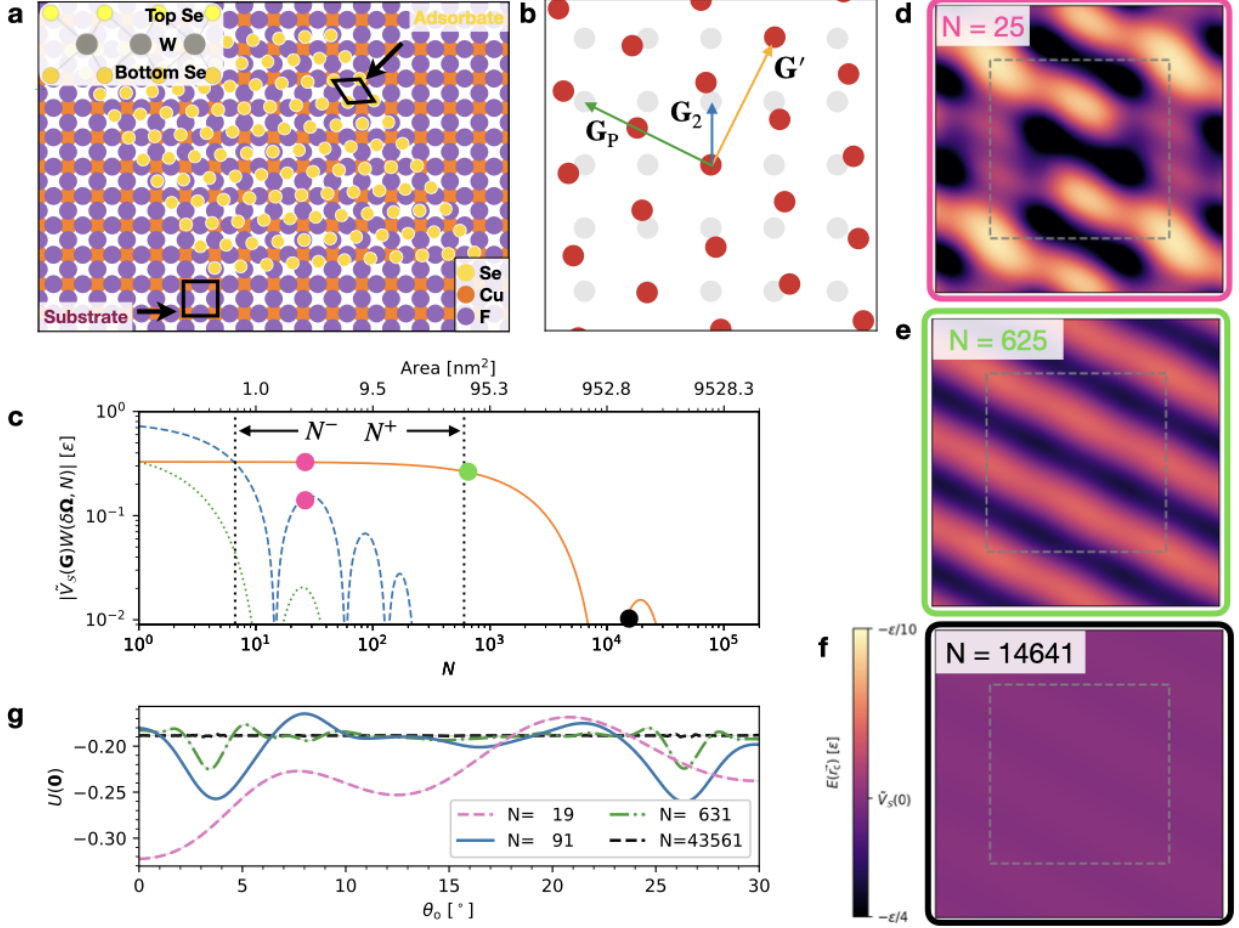

FIG. 1. **A realistic interface with approximate directional structural lubricity.** (a) The interface: a monolayer WSe<sub>2</sub> flake (yellow dots=bottom Se atoms) deposited on a CuF(001) surface (orange dots=Cu atoms; purple dots=F atoms). The angular misalignment is  $\theta_0 = 3.317^\circ$ . The interlocking potential is computed considering the interface between the CuF surface and the bottom Se layer, indicated in the top left inset. (b) Reciprocal lattices of the adsorbate ( $\mathcal{Q}$ , red) and substrate ( $\mathcal{G}$ , gray), with marked a CMV  $\mathbf{G}' = 2\pi/b(1,2)$  (orange arrow), a perpendicular reciprocal vector  $\mathbf{G}_P = 2\pi/b(-2,1)$  (green arrow), and the vector  $\mathbf{G}_2 = 2\pi/b(0,1)$  (blue arrow) yielding a sizable Fourier component at small flake size. (c) The size dependence of the Fourier components associated to  $\mathbf{G}'$  (orange solid line),  $\mathbf{G}_P$  (green dotted), and  $\mathbf{G}_2$  (blue dashed). The vertical lines mark the  $\mathbf{G}'$  critical sizes  $N^- \simeq 7$  and  $N^+ = 611$  defined in Sec. 5D in the main text (d,e,f) Maps of the interlocking potential  $U(\mathbf{r}_c)$  in the  $[-b, b] \times [-b, b]$  square for the three selected flake sizes marked as matching-colored dots in panel (c); the energy scale is indicated at the left of panel f. The dashed gray square delimits the Wigner-Seitz cell of the substrate lattice  $\mathcal{S}$ . (g) Potential energy  $U(\mathbf{r}_c)$ , Eq. 2 in the main text, as a function of the misalignment angle  $\theta_0$  for hexagonal clusters of the sizes reported in the legend; the center of mass is fixed at  $\mathbf{r}_c = \mathbf{0}$ .
